# Supplementary material for: Rethinking Concepts and Categories for Understanding the Neurodevelopmental Effects of Childhood Adversity
Source: PubMed Central journal article supplement — Perspect Psychol Sci. 2020 Jul 15;16(1):67–93. doi: 10.1177/1745691620920725 (PMC7809338; doi:10.1177/1745691620920725), 2020-07-15
Supplement: Smith_Supplemental_Material.pdf [file Smith_Supplemental_Material.pdf]

## Supplemental Material

Table S1: Summary of the range of findings in recent papers contrasting the effects of threat and deprivation

| Citation                                             | Measures of Threat                                                                                                                         | Measures of Deprivation                                                                                                      | Threat Findings                                                                                                                                                                                                                                                                                                                                                                                            | Deprivation Findings                                                                                                                                                                                                                                | Paper Conclusion                                                                                                                                                               |
|------------------------------------------------------|--------------------------------------------------------------------------------------------------------------------------------------------|------------------------------------------------------------------------------------------------------------------------------|------------------------------------------------------------------------------------------------------------------------------------------------------------------------------------------------------------------------------------------------------------------------------------------------------------------------------------------------------------------------------------------------------------|-----------------------------------------------------------------------------------------------------------------------------------------------------------------------------------------------------------------------------------------------------|--------------------------------------------------------------------------------------------------------------------------------------------------------------------------------|
| Busso et al., 2017<br><i>Psychosomatic Medicine</i>  | Violence exposure - any exposure to emotional abuse, sexual abuse, physical abuse, violence in school home and neighborhood                | Poverty                                                                                                                      | <ul style="list-style-type: none"> <li>• Positively associated with externalizing and internalizing symptoms</li> <li>• Associated with reduced sympathetic and HPA reactivity to TSST</li> <li>• HPA axis reactivity during TSST mediated effects on internalizing and externalizing symptoms</li> </ul>                                                                                                  | <ul style="list-style-type: none"> <li>• Positively associated with externalizing symptoms</li> <li>• Associated with higher baseline HPA axis activity (cortisol)</li> </ul>                                                                       | <ul style="list-style-type: none"> <li>• <b>Threat has specific effects on HPA and autonomic system</b> and these effects mediate associations with psychopathology</li> </ul> |
| Colich et al., 2019<br><i>Psychological Medicine</i> | Physical abuse; witnessing domestic violence; sexual assault, witnessing or being the victim of violence in the community; emotional abuse | Physical & psychosocial neglect; financial insecurity; food insecurity; low parental education attainment; household poverty | <ul style="list-style-type: none"> <li>• Increased number of threat exposures associated with earlier age at menarche</li> <li>• Increased number of threat exposures associated with increased odds of post-menarche distress, fear, externalizing and eating disorders</li> <li>• Age at menarche mediated association between cumulative threat ELAs on distress and externalizing disorders</li> </ul> | <ul style="list-style-type: none"> <li>• Number of deprivation exposures not associated with age at menarche</li> <li>• Increased number of deprivation exposures associated with elevated odds of post-menarche externalizing disorders</li> </ul> | <ul style="list-style-type: none"> <li>• <b>Threat specific effects on pubertal timing</b> which mediates relationship with post menarche psychological distress</li> </ul>    |

|                                                             |                                                                                                                                                                                     |                          |                                                                                                                                                                                                                                                                                                                                                                                                           |                                                                                                                                                                                                                                                                                                                                                                                                                                                                                                                                                                                                                                         |                                                                                                                                                                                                               |
|-------------------------------------------------------------|-------------------------------------------------------------------------------------------------------------------------------------------------------------------------------------|--------------------------|-----------------------------------------------------------------------------------------------------------------------------------------------------------------------------------------------------------------------------------------------------------------------------------------------------------------------------------------------------------------------------------------------------------|-----------------------------------------------------------------------------------------------------------------------------------------------------------------------------------------------------------------------------------------------------------------------------------------------------------------------------------------------------------------------------------------------------------------------------------------------------------------------------------------------------------------------------------------------------------------------------------------------------------------------------------------|---------------------------------------------------------------------------------------------------------------------------------------------------------------------------------------------------------------|
| Dennison et al., 2017 <i>Child Development</i>              | Abuse and domestic violence                                                                                                                                                         | Neglect; food insecurity | <ul style="list-style-type: none"> <li>•Associated with increased depression scores but not after controlling for deprivation</li> <li>•Associated with reduced integrity of white matter in left external capsule</li> <li>•Moderated development of white matter integrity in anterior limb of internal capsule, such that trauma associated with reduced age related increases in integrity</li> </ul> | <ul style="list-style-type: none"> <li>•Associated with increased depressive symptoms but after controlling for threat only caregiver neglect associated with depression</li> <li>•Food insecurity associated with lower performance in reward learning task</li> <li>•Associated with reduced white matter integrity in left anterior limb of internal capsule and greater integrity in left uncinate</li> <li>•Neglect associated with increased white matter integrity in left uncinate</li> <li>•White matter integrity in anterior limb of internal capsule mediated association between food insecurity and depression</li> </ul> | <ul style="list-style-type: none"> <li>•<b>Deprivation associated with poorer reward learning and alterations in dopaminergic circuits</b> which mediate symptom of depression, but threat is not.</li> </ul> |
| Gooding et al., 2016 <i>Journal of Pediatric Psychology</i> | Physical, sexual, emotional abuse                                                                                                                                                   | SES (parental education) | <ul style="list-style-type: none"> <li>•Associated with increased depressive and PTSD symptoms</li> <li>•Associated with reduced increases in systolic and diastolic blood pressure during stress</li> </ul>                                                                                                                                                                                              | <ul style="list-style-type: none"> <li>•Direct effects not assessed; Only controlled for</li> </ul>                                                                                                                                                                                                                                                                                                                                                                                                                                                                                                                                     | <ul style="list-style-type: none"> <li>•<b>Threat may have specific effects on cardiovascular stress reactivity</b></li> </ul>                                                                                |
| Heleniak et al., 2016 <i>Biological Psychology</i>          | Sexual abuse; life threatening accidents; natural disaster; witnessing severe injury or death; victim of physical violence or assault; threatened with weapon; captive or abducted; | SES (parental education) | <ul style="list-style-type: none"> <li>•Associated with increased internalizing and externalizing symptoms</li> <li>•Associated with reduced sympathetic reactivity and cardiac output to speech stressor</li> <li>•Cardiac output during speech preparation mediated relationship</li> </ul>                                                                                                             | <ul style="list-style-type: none"> <li>•Direct effects not assessed; Only controlled for</li> </ul>                                                                                                                                                                                                                                                                                                                                                                                                                                                                                                                                     | <ul style="list-style-type: none"> <li>•<b>Threat may have specific effects on cardiovascular stress reactivity</b> which is linked to development of psychopathology</li> </ul>                              |

|                                                                             |                                                                                              |                                             |                                                                                                                                                                                                                                                                                                                                                                                                                                                                               |                                                                        |                                                                                                                                         |
|-----------------------------------------------------------------------------|----------------------------------------------------------------------------------------------|---------------------------------------------|-------------------------------------------------------------------------------------------------------------------------------------------------------------------------------------------------------------------------------------------------------------------------------------------------------------------------------------------------------------------------------------------------------------------------------------------------------------------------------|------------------------------------------------------------------------|-----------------------------------------------------------------------------------------------------------------------------------------|
|                                                                             | family violence;<br>physical abuse                                                           |                                             | between threat and<br>externalizing symptoms                                                                                                                                                                                                                                                                                                                                                                                                                                  |                                                                        |                                                                                                                                         |
| Heleniak & McLaughlin,<br>2019 <i>Development &amp;<br/>Psychopathology</i> | Physical, sexual,<br>emotional abuse;<br>domestic violence<br>exposure; violence<br>exposure | Income to needs ratio;<br>emotional neglect | <ul style="list-style-type: none"> <li>•Associated with externalizing symptoms and ODD, not conduct disorder (varied by type)</li> <li>•Associated with performance on cognitive and affective theory of mind (varied by type)</li> <li>•Cognitive theory of mind mediated physical and sexual abuse effects on externalizing symptoms; Cognitive and affective theory of mind mediated effects of emotional abuse and violence exposure on externalizing symptoms</li> </ul> | •Not associated with cognitive or affective theory of mind performance | • <b>Threat specific effects on affective and cognitive theory of mind</b> which mediates symptoms of psychopathology                   |
| Jenness et al., 2018<br><i>Development &amp;<br/>Psychopathology</i>        | Physical and sexual<br>abuse; domestic<br>violence; other<br>violence exposure               | SES (parent education)                      | <ul style="list-style-type: none"> <li>•During retrieval, associated with reduced activation in left lateral occipital cortex/TPJ, left superior temporal sulcus, left angular gyrus; Both frequency and severity associated with superior temporal sulcus activation - negatively</li> <li>•Significant indirect effect of violence exposure on working memory performance through activation in superior</li> </ul>                                                         | •Not directly tested; Only controlled for                              | • <b>Threat is associated with specific effects on working memory in emotional context through effects on fronto-parietal circuits.</b> |

---

temporal sulcus during  
retrieval

---

|                                                            |                                                                   |                                    |                                                                                                                                                                                                                                                                                                                                                                                                                                                                                                                                                     |                                                                                             |                                                                                                                                 |
|------------------------------------------------------------|-------------------------------------------------------------------|------------------------------------|-----------------------------------------------------------------------------------------------------------------------------------------------------------------------------------------------------------------------------------------------------------------------------------------------------------------------------------------------------------------------------------------------------------------------------------------------------------------------------------------------------------------------------------------------------|---------------------------------------------------------------------------------------------|---------------------------------------------------------------------------------------------------------------------------------|
| Jenness et al., 2019 <i>Journal of Abnormal Psychology</i> | Physical abuse;<br>sexual abuse;<br>domestic violence<br>exposure | SES                                | <ul style="list-style-type: none"><li>•Associated with increased PTSD symptoms;<br/>Moderated by resting RSA.</li><li>•Associated with reduced extinction learning;<br/>Moderated by resting RSA</li></ul>                                                                                                                                                                                                                                                                                                                                          | •Not directly tested; Only controlled for                                                   | <b>•Threat specific effects on fear conditioning</b> which are moderated by ANS activity and associated with PTSD symptom risk. |
| Lambert et al., 2017 <i>Journal of Neuroscience</i>        | Physical, sexual, emotional abuse;<br>domestic violence exposure  | Income to needs, emotional neglect | <ul style="list-style-type: none"><li>•Associated with lower memory for context when paired with angry faces</li><li>•Associated with decreased hippocampal volume and reduced hippocampal activation during context encoding when context paired with angry faces</li><li>•Associated with increased functional connectivity between right hippocampus and right vIPFC</li><li>•Hippocampal-vIPFC connectivity and hippocampal volume mediated association between threat exposure and context memory for trials paired with angry faces</li></ul> | •Poverty associated with reduced hippocampal activity during trials paired with angry faces | <b>•Threat has specific effects on hippocampal-prefrontal systems which is linked to emotional memory</b>                       |

---

---

|                                                                  |                                                                                           |                       |                                                                                                                                                                                                                                                                                                                             |                                                                                                                                                           |                                                                                                                                                                                                                                                                                                    |
|------------------------------------------------------------------|-------------------------------------------------------------------------------------------|-----------------------|-----------------------------------------------------------------------------------------------------------------------------------------------------------------------------------------------------------------------------------------------------------------------------------------------------------------------------|-----------------------------------------------------------------------------------------------------------------------------------------------------------|----------------------------------------------------------------------------------------------------------------------------------------------------------------------------------------------------------------------------------------------------------------------------------------------------|
| Lambert et al., 2017<br><i>Development &amp; Psychopathology</i> | Physical, emotional, and sexual abuse; violence exposure in school, home and neighborhood | Income to needs ratio | <ul style="list-style-type: none"><li>•Associated with decreased adaptation to emotional conflict and poorer inhibitory control in emotional Stroop</li><li>•Sexual abuse associated with poor adaptation and sexual and physical abuse associated with poor inhibition on emotional Stroop when examined by type</li></ul> | <ul style="list-style-type: none"><li>•Associated with poorer inhibition and switching in flanker task and worse inhibition on emotional Stroop</li></ul> | <ul style="list-style-type: none"><li>•<b>Threat associated with emotion regulation deficits but not cognitive control</b>, and <b>deprivation associated with cognitive control deficits but not emotion regulation</b>. Both associated with inhibition deficits in emotional context.</li></ul> |
|------------------------------------------------------------------|-------------------------------------------------------------------------------------------|-----------------------|-----------------------------------------------------------------------------------------------------------------------------------------------------------------------------------------------------------------------------------------------------------------------------------------------------------------------------|-----------------------------------------------------------------------------------------------------------------------------------------------------------|----------------------------------------------------------------------------------------------------------------------------------------------------------------------------------------------------------------------------------------------------------------------------------------------------|

---

---

|                                                                     |                                                                                    |                                           |                                                                                                                                                                                                                                                                                                                                                                                                                                                                                                                           |                                       |                                                                                                                                                                                       |
|---------------------------------------------------------------------|------------------------------------------------------------------------------------|-------------------------------------------|---------------------------------------------------------------------------------------------------------------------------------------------------------------------------------------------------------------------------------------------------------------------------------------------------------------------------------------------------------------------------------------------------------------------------------------------------------------------------------------------------------------------------|---------------------------------------|---------------------------------------------------------------------------------------------------------------------------------------------------------------------------------------|
| Lambert et al., 2019<br><i>Developmental Cognitive Neuroscience</i> | Physical and sexual abuse; domestic violence exposure; community violence exposure | Income to needs ratio; parental education | <ul style="list-style-type: none"><li>•Threat associated with increased performance on associative memory for emotional faces for angry faces only</li><li>•During encoding: greater activation in mPFC in precentral gyrus, medial frontal gyrus, and superior frontal gyrus, for neutral stimuli in right inferior frontal gyrus, precentral gyrus, and insula; decreased activation in hippocampus, for angry faces in right intraparietal sulcus, supramarginal gyrus, angular gyrus, and postcentral gyrus</li></ul> | •Not directly tested; Only controlled | <ul style="list-style-type: none"><li>•<b>Threat is associated with broad associative learning deficits through alterations in hippocampal and fronto-parietal circuits</b></li></ul> |
|---------------------------------------------------------------------|------------------------------------------------------------------------------------|-------------------------------------------|---------------------------------------------------------------------------------------------------------------------------------------------------------------------------------------------------------------------------------------------------------------------------------------------------------------------------------------------------------------------------------------------------------------------------------------------------------------------------------------------------------------------------|---------------------------------------|---------------------------------------------------------------------------------------------------------------------------------------------------------------------------------------|

---

|                                                                |                                                                                          |                                                                                                       |                                                                                                                                                                                                                                                                              |                                                                                                               |                                                                                                                                                                                                                                                                               |
|----------------------------------------------------------------|------------------------------------------------------------------------------------------|-------------------------------------------------------------------------------------------------------|------------------------------------------------------------------------------------------------------------------------------------------------------------------------------------------------------------------------------------------------------------------------------|---------------------------------------------------------------------------------------------------------------|-------------------------------------------------------------------------------------------------------------------------------------------------------------------------------------------------------------------------------------------------------------------------------|
| Lawson et al., 2017 <i>PLOS One</i>                            | Abuse; exposure to domestic violence; neglect                                            | SES - parent education, occupation, financial circumstances                                           | <ul style="list-style-type: none"> <li>•Maltreatment predicted smaller hippocampal volumes</li> <li>•Did not predict amygdala volume</li> <li>•Interaction with sex - higher adversity higher right amygdala in females and lower in males</li> </ul>                        | •Did not predict hippocampal or amygdala volume                                                               | <ul style="list-style-type: none"> <li>•<b>Maltreatment has a main effect on hippocampal volume</b> while <b>SES has sex specific effects</b> possibly reflective of differential effects of different forms of stressful childhood adversity on brain development</li> </ul> |
| LoPilato et al., 2019 <i>Schizophrenia Research</i>            | Emotional abuse; physical abuse; psychological bullying; physical bullying; sexual abuse | Neglect; income-to-needs ratio; restricted peer interactions; absence of biological parental figure   | •Threat not associated with corticolimbic volume                                                                                                                                                                                                                             | •Deprivation associated with smaller left cortical volume, right cortical volume and right hippocampal volume | <ul style="list-style-type: none"> <li>•<b>Deprivation is uniquely associated with smaller cortical and hippocampal volume</b> in youth at high risk for clinical psychosis</li> </ul>                                                                                        |
| LoPilato et al., 2019 <i>Development &amp; Psychopathology</i> | Emotional abuse; physical abuse; psychological bullying; physical bullying; sexual abuse | Neglect; income-to-needs ratio; restricted peer interactions; absence of a biological parental figure | <ul style="list-style-type: none"> <li>•Threat associated with stress perception, effect moderated by sex</li> <li>•Threat associated with morning cortisol, with effect being mediated by stress perception when accounting for high clinical risk for psychosis</li> </ul> | •No significant association with stress perception or morning cortisol                                        | <ul style="list-style-type: none"> <li>•<b>Threat has sex specific effects on stress perception and morning cortisol levels</b></li> </ul>                                                                                                                                    |

|                                                                     |                                                               |                                                                                                                                        |                                                                                                                                                                                                                                                                                                                                                       |                                                                                                                                                                                                                                                         |                                                                                                                                                                                    |
|---------------------------------------------------------------------|---------------------------------------------------------------|----------------------------------------------------------------------------------------------------------------------------------------|-------------------------------------------------------------------------------------------------------------------------------------------------------------------------------------------------------------------------------------------------------------------------------------------------------------------------------------------------------|---------------------------------------------------------------------------------------------------------------------------------------------------------------------------------------------------------------------------------------------------------|------------------------------------------------------------------------------------------------------------------------------------------------------------------------------------|
| Machlin et al., 2019<br><i>Developmental Science</i>                | Not assessed                                                  | SES (parent education, income, occupation)                                                                                             |                                                                                                                                                                                                                                                                                                                                                       | <ul style="list-style-type: none"> <li>•Increased risk for ADHD</li> <li>•Reduced volume in right precentral cortex, right amygdala, caudate, cerebellum, and hippocampus</li> <li>•Indirect effect of SES on ADHD through cerebellum volume</li> </ul> | <ul style="list-style-type: none"> <li>•<b>Deprivation may have specific effects on frontal cerebellar circuits</b> that places children at risk for learning disorders</li> </ul> |
| Machlin et al., 2019<br><i>Frontiers in Behavioral Neuroscience</i> | Violence exposure; domestic violence exposure; physical abuse | Emotional, cognitive, physical, and supervisory neglect; abandonment; age appropriate cognitive stimulation (HOME); parental education | <ul style="list-style-type: none"> <li>•No association with cognitive control performance</li> <li>•No main effect on threat conditioning but was an interaction with age such that age was not associated with SCR responses for high threat but was for low</li> </ul>                                                                              | <ul style="list-style-type: none"> <li>•Deprivation associated with worse cognitive control performance</li> <li>•No association with threat conditioning</li> </ul>                                                                                    | <ul style="list-style-type: none"> <li>•<b>Threat has specific effects on fear learning</b> and <b>deprivation has specific effects on general cognitive processes</b></li> </ul>  |
| McLaughlin et al., 2014<br><i>Psychosomatic Medicine</i>            | Physical; sexual; emotion abuse                               | Poverty                                                                                                                                | <ul style="list-style-type: none"> <li>•Associated with reduced increases in cardiac output during speech stressor prep and math and associated with increases in total peripheral resistance during speech prep</li> </ul>                                                                                                                           | <ul style="list-style-type: none"> <li>•Not directly tested; Only controlled</li> </ul>                                                                                                                                                                 | <ul style="list-style-type: none"> <li>•<b>Threat has specific effects on cardiovascular stress reactivity</b> that may have implications for psychopathology</li> </ul>           |
| McLaughlin et al., 2016<br><i>Neuropsychopharmacology</i>           | Physical and sexual abuse; community violence exposure        | Poverty                                                                                                                                | <ul style="list-style-type: none"> <li>•Associated with blunted SCR response during fear conditioning; Not associated with differences in self-reported fear</li> <li>•Associated with reduced hippocampal and amygdala volume</li> <li>•SCR responses during conditioning mediated relationship between threat and externalizing symptoms</li> </ul> | <ul style="list-style-type: none"> <li>•Not directly tested; Only controlled</li> </ul>                                                                                                                                                                 | <ul style="list-style-type: none"> <li>•<b>Threat has specific effects on fear learning</b> which may be associated with risk for psychopathology</li> </ul>                       |



|                                                                                                 |                                                                                                        |                                                                                                                                     |                                                                                                                                                                                                                                   |                                                                                                                                                                                                                                                                                                                                                                      |                                                                                                                                       |
|-------------------------------------------------------------------------------------------------|--------------------------------------------------------------------------------------------------------|-------------------------------------------------------------------------------------------------------------------------------------|-----------------------------------------------------------------------------------------------------------------------------------------------------------------------------------------------------------------------------------|----------------------------------------------------------------------------------------------------------------------------------------------------------------------------------------------------------------------------------------------------------------------------------------------------------------------------------------------------------------------|---------------------------------------------------------------------------------------------------------------------------------------|
| Marusak et al., 2017<br><i>Biological Psychiatry: Cognitive Neuroscience &amp; Neuroimaging</i> | Abuse; violence exposure                                                                               | Income; neglect                                                                                                                     | <ul style="list-style-type: none"> <li>•Lower VTA right hippocampal resting state connectivity</li> <li>•Increased SN resting state connectivity with right hippocampus - not significant after controlling for income</li> </ul> | •Not directly tested; Only controlled                                                                                                                                                                                                                                                                                                                                | • <b>Threat may have specific effects on dopaminergic neural circuits</b>                                                             |
| Miller et al., 2018 <i>Journal of Abnormal Psychology</i>                                       | Physical abuse; harsh physical discipline; hostility in observed interaction                           | Environment deprivation scale (questions about whether there are age appropriate toys, if outside is safe, if there are books etc.) | • Positive association with higher externalizing and internalizing behaviors                                                                                                                                                      | <ul style="list-style-type: none"> <li>• Associated with lower verbal abilities (measured using vocab measure from WISC)</li> <li>• No direct association between internalizing or externalizing but indirect effect on externalizing problems via lower verbal abilities</li> <li>• SES also associated with externalizing problems via verbal abilities</li> </ul> | • <b>Deprivation has specific effects on verbal abilities</b> which are a mechanism through which deprivation affects psychopathology |
| Mitchell et al., 2018, <i>Psychoneuroendocrinology</i>                                          | Childhood Trauma (emotional abuse, physical abuse, sexual abuse, emotional, neglect, physical neglect) | Childhood SES; Parental Education (paternal and maternal)                                                                           | •No significant effects of total trauma or abuse types on telomere length                                                                                                                                                         | <ul style="list-style-type: none"> <li>•Lower SES associated with shorter telomere length</li> <li>•Paternal and maternal educational attainment positively associated with telomere length</li> </ul>                                                                                                                                                               | • <b>Socioeconomic status</b> may have distinct effects on telomere lengths                                                           |

|                                                            |                                                                                                                       |                                                                                 |                                                                                                                                                                                                                                                                                                                                                                                                                                                                  |                                                                                                                                                                                                                                                                      |                                                                                                                                                                                             |
|------------------------------------------------------------|-----------------------------------------------------------------------------------------------------------------------|---------------------------------------------------------------------------------|------------------------------------------------------------------------------------------------------------------------------------------------------------------------------------------------------------------------------------------------------------------------------------------------------------------------------------------------------------------------------------------------------------------------------------------------------------------|----------------------------------------------------------------------------------------------------------------------------------------------------------------------------------------------------------------------------------------------------------------------|---------------------------------------------------------------------------------------------------------------------------------------------------------------------------------------------|
| Nicol et al., 2015<br><i>Translational Psychiatry</i>      | Physical abuse;<br>sexual abuse;<br>emotional abuse                                                                   | Physical neglect;<br>emotional neglect                                          | <ul style="list-style-type: none"> <li>•Physical abuse associated with brain activation to fearful vs neutral faces in medial frontal gyrus, pulvinar, and cerebellum in patients with borderline personality disorder</li> <li>•No associations of emotional abuse with brain activation in patients with borderline personality disorder</li> <li>•Did not assess specific effects of sexual abuse in patients with borderline personality disorder</li> </ul> | <ul style="list-style-type: none"> <li>•Did not assess specific effects, but there was no effect of total trauma score (including physical, sexual and emotional abuse) in patients with borderline personality disorder</li> </ul>                                  | <ul style="list-style-type: none"> <li>•<b>Threat, specifically physical abuse, is associated with neural responses to fear in patients</b> with borderline personality disorder</li> </ul> |
| Peverill et al., 2019 <i>Child Maltreatment</i>            | Physical, sexual, emotional abuse; community violence exposure                                                        | SES (parent education)                                                          | <ul style="list-style-type: none"> <li>•Associated with more negative connectivity of left amygdala with vmPFC during emotion regulation task - only abuse</li> <li>•Associated with internalizing and externalizing psychopathology</li> </ul>                                                                                                                                                                                                                  | <ul style="list-style-type: none"> <li>•Not directly tested; Only controlled</li> </ul>                                                                                                                                                                              | <ul style="list-style-type: none"> <li>•<b>Threat has specific effects on amygdala PFC circuits</b> involved in emotion regulation</li> </ul>                                               |
| Platt et al., 2018 <i>American Journal of Epidemiology</i> | Physical abuse; domestic violence exposure; sexual abuse; violent victimization; witnessing violence; emotional abuse | Financial insecurity; food insecurity; neglect; poverty; low parental education | <ul style="list-style-type: none"> <li>•Physical abuse, domestic violence, and emotional abuse associated with increased risk for low intelligence score.</li> </ul>                                                                                                                                                                                                                                                                                             | <ul style="list-style-type: none"> <li>•Any deprivation associated with lower mean intelligence score</li> <li>•Parent education and neglect are the only subtypes that are associated with increased risk of low intelligence when examined individually</li> </ul> | <ul style="list-style-type: none"> <li>•<b>Deprivation has stronger negative effects on intelligence</b> than threat.</li> </ul>                                                            |

|                                                     |                           |                                                                              |                                                                                                                                                                                                                                                                                                                                                      |                                                                                                                                                                                                                                                                                                                                                                                                                                                                                                                                                     |                                                                                                                                |
|-----------------------------------------------------|---------------------------|------------------------------------------------------------------------------|------------------------------------------------------------------------------------------------------------------------------------------------------------------------------------------------------------------------------------------------------------------------------------------------------------------------------------------------------|-----------------------------------------------------------------------------------------------------------------------------------------------------------------------------------------------------------------------------------------------------------------------------------------------------------------------------------------------------------------------------------------------------------------------------------------------------------------------------------------------------------------------------------------------------|--------------------------------------------------------------------------------------------------------------------------------|
| Rodman et al., 2019<br><i>Biological Psychiatry</i> | Physical and sexual abuse | Income to needs ratio                                                        | <ul style="list-style-type: none"> <li>•Greater modulation in amygdala in abused children predicted lower risk of depression; No relationship in non-abuse children; Similar effect for superior frontal gyrus and dACC</li> <li>•Greater use of cognitive reappraisal strategy moderated relationship between child abuse and depression</li> </ul> | •Not directly tested; Only controlled                                                                                                                                                                                                                                                                                                                                                                                                                                                                                                               | • <b>Threat links to mental health may be through neural effects on neurobiological systems involved in emotion regulation</b> |
| Rosen et al., in press<br><i>Child Development</i>  | Violence exposure         | Income to needs ratio, parental education, cognitive stimulation in the home | •Negatively associated with executive function performance                                                                                                                                                                                                                                                                                           | <ul style="list-style-type: none"> <li>•SES as measured by income to needs and parental education and cognitive stimulation associated with executive functioning (working memory, cognitive flexibility, and inhibition); Cognitive stimulation associated with growth in cognitive flexibility over time</li> <li>•SES associated with cognitive stimulation in the home</li> <li>•Cognitive stimulation mediated effects of SES on executive function</li> <li>•Executive functioning mediated effects of SES on academic performance</li> </ul> | • <b>Deprivation has specific effects on executive functioning</b> and through this influences academic outcomes               |

|                                                                           |                                                                  |                                                           |                                                                                                                                                                                                                                                                                                                                                                                                                                                                                                                                                                         |                                                                                                                                                                                                                                                                                                                                                                                                                                                                                                                                                                                                                                                                                                                                            |                                                                                                                             |
|---------------------------------------------------------------------------|------------------------------------------------------------------|-----------------------------------------------------------|-------------------------------------------------------------------------------------------------------------------------------------------------------------------------------------------------------------------------------------------------------------------------------------------------------------------------------------------------------------------------------------------------------------------------------------------------------------------------------------------------------------------------------------------------------------------------|--------------------------------------------------------------------------------------------------------------------------------------------------------------------------------------------------------------------------------------------------------------------------------------------------------------------------------------------------------------------------------------------------------------------------------------------------------------------------------------------------------------------------------------------------------------------------------------------------------------------------------------------------------------------------------------------------------------------------------------------|-----------------------------------------------------------------------------------------------------------------------------|
| <p>Sheridan et al., 2017<br/><i>Development &amp; Psychopathology</i></p> | <p>Physical, emotional, and sexual abuse; community violence</p> | <p>Physical and emotional neglect; parental education</p> | <ul style="list-style-type: none"> <li>•Abuse associated with parent report of inhibitory control but not working memory or global executive functioning; no association after controlling for parent education and neglect</li> <li>•Community violence exposure not associated with parent report of inhibitory control, working memory, or global executive functioning</li> <li>•In working memory task, abuse not associated with accuracy for high working memory trial load</li> <li>•Abuse not associated with differential brain activation in ROIs</li> </ul> | <ul style="list-style-type: none"> <li>•Parent education associated with: parent report of inhibitory control but not working memory or global executive function; accuracy on working memory task for trials involving high working memory load; activation in medial and lateral parietal cortex during working memory encoding and delay</li> <li>•Neglect associated with: parent report of inhibitory control and global executive function but not working memory</li> <li>•Association with medial frontal gyrus recruitment during high relative to low working memory load condition</li> <li>•Related to activity in anterior cingulate cortex during encoding and delay for high compared to low working memory load</li> </ul> | <p>•<b>Deprivation associated with poorer working memory through less efficient PFC recruitment, but threat is not.</b></p> |
| <p>Slopen et al., 2019<br/><i>Psychosomatic Medicine</i></p>              | <p>Not assessed</p>                                              | <p>Institutional deprivation</p>                          | <ul style="list-style-type: none"> <li>•Not associated with differences in immune and cardiometabolic markers</li> </ul>                                                                                                                                                                                                                                                                                                                                                                                                                                                | <p>•<b>Effects on immune system may be specific to threat</b> experiences given lack of evidence for effects from deprivation</p>                                                                                                                                                                                                                                                                                                                                                                                                                                                                                                                                                                                                          |                                                                                                                             |

|                                                     |                                                                                                                                                                                                              |                                   |                                                                                                                                                                                                                                                                                                                                                                                                                                                                                                               |                                                                                                                                                           |                                                                                                                                                                                                |
|-----------------------------------------------------|--------------------------------------------------------------------------------------------------------------------------------------------------------------------------------------------------------------|-----------------------------------|---------------------------------------------------------------------------------------------------------------------------------------------------------------------------------------------------------------------------------------------------------------------------------------------------------------------------------------------------------------------------------------------------------------------------------------------------------------------------------------------------------------|-----------------------------------------------------------------------------------------------------------------------------------------------------------|------------------------------------------------------------------------------------------------------------------------------------------------------------------------------------------------|
| Sumner et al., 2019<br><i>Biological Psychiatry</i> | Physical abuse;<br>sexual abuse; and<br>domestic violence                                                                                                                                                    | Poverty; emotional<br>neglect     | <ul style="list-style-type: none"> <li>•Associated with accelerated biological aging as assessed through epigenetic age acceleration and advanced pubertal stage</li> <li>•Examining specific types, only significant associations for epigenetic age for domestic violence and number of types of trauma and pubertal age was only associated with number of types of trauma</li> <li>•Associated with increased internalizing and externalizing symptoms and this was mediated by epigenetic age</li> </ul> | <ul style="list-style-type: none"> <li>•Associated with higher depressive and externalizing problems, but not epigenetic age or pubertal stage</li> </ul> | <ul style="list-style-type: none"> <li>•<b>Threat has specific effects on biological aging</b> which mediates effects on psychopathology, while deprivation does not</li> </ul>                |
| Teicher et al., 2018<br><i>Neuroimage</i>           | Parental nonverbal emotional abuse;<br>parental physical maltreatment;<br>parental verbal abuse; sexual abuse;<br>peer emotional abuse; peer physical abuse; interparental violence and violence to siblings | Emotional and physical<br>neglect | <ul style="list-style-type: none"> <li>•At age 15 and 16 predicted bilateral hippocampal volume</li> <li>•Abuse most significant predictors at age 10, 11, 15, and 16</li> </ul>                                                                                                                                                                                                                                                                                                                              | <ul style="list-style-type: none"> <li>•At age 7 predicted bilateral hippocampal volume</li> <li>•Males predicted hippocampal volume 1 and 7</li> </ul>   | <ul style="list-style-type: none"> <li>•<b>Abuse has specific effects on hippocampal volume in females</b> while <b>neglect has specific effects on hippocampal volume in males</b></li> </ul> |

---

|                                                                        |                                                 |                                           |                                                                                                                                                                                                                                                                        |                                                                                                                                                                                                                                                                                                     |                                                                                                                                                                                              |
|------------------------------------------------------------------------|-------------------------------------------------|-------------------------------------------|------------------------------------------------------------------------------------------------------------------------------------------------------------------------------------------------------------------------------------------------------------------------|-----------------------------------------------------------------------------------------------------------------------------------------------------------------------------------------------------------------------------------------------------------------------------------------------------|----------------------------------------------------------------------------------------------------------------------------------------------------------------------------------------------|
| Vaughn-Coaxum et al.,<br>2019 <i>Development &amp; Psychopathology</i> | Community violence exposure; peer victimization | Income-to-needs ratio; parental education | <ul style="list-style-type: none"><li>•Associated with depressive symptoms severity but not inhibitory regulation on cognitive task</li><li>•Resting RSA and skin conductance moderated associations between threat exposure and depressive symptom severity</li></ul> | <ul style="list-style-type: none"><li>•Lower deprivation associated with lower depressive symptom severity only in the context of higher inhibitory regulation on cognitive task</li><li>•Resting RSA and skin conductance did not moderate effects of deprivation on depressive symptoms</li></ul> | <b>Threat has specific effects on depressive symptoms through physiological functioning</b> and <b>deprivation has specific effects on depressive symptoms through cognitive functioning</b> |
|------------------------------------------------------------------------|-------------------------------------------------|-------------------------------------------|------------------------------------------------------------------------------------------------------------------------------------------------------------------------------------------------------------------------------------------------------------------------|-----------------------------------------------------------------------------------------------------------------------------------------------------------------------------------------------------------------------------------------------------------------------------------------------------|----------------------------------------------------------------------------------------------------------------------------------------------------------------------------------------------|

---

|                                                                    |                                                                                                                                                                                                              |                                                                          |                                                                                                  |                                                                                        |                                                                                                                        |
|--------------------------------------------------------------------|--------------------------------------------------------------------------------------------------------------------------------------------------------------------------------------------------------------|--------------------------------------------------------------------------|--------------------------------------------------------------------------------------------------|----------------------------------------------------------------------------------------|------------------------------------------------------------------------------------------------------------------------|
| Whalen et al., 2016<br><i>Psychosomatic Medicine</i>               | Living in a single-caregiver household; maternal psychopathology; parental arrest; foster care placement; physical abuse; sexual abuse; caregiver report of being unable to meet the families financial need | Income-to-needs ratio                                                    | •Significant predictor of membership in group with increasing physical health problems over time | •Significant predictor of membership in group with increasing physical health problems | •Both <b>threat</b> and <b>deprivation</b> have similar effects on trajectories of physical health                     |
| Zhang et al., 2018 <i>Child Psychiatry &amp; Human Development</i> | Parental abuse (physical, sexual and emotional abuse)                                                                                                                                                        | Parental neglect (physical neglect and unpreferable rearing environment) | •Parental abuse associated with conduct problems and peer problems                               | •Parental neglect associated with conduct problems and hyperactivity/inattention       | • <b>Unique effects of parental abuse on peer problems</b> and of <b>parental neglect on hyperactivity/inattention</b> |

*Note:* Claims of threat specific effects are in RED and claims of deprivation specific effects are in BLUE. Selected papers were (a) published between 2014 – 2019 and (b) made direct comparisons between different types or domains of adversity. This is not an exhaustive literature review, but merely demonstrates the heterogeneity and inconsistency of how issues of adversity are manifested in the literature. Abbreviations: TSST: Trier Social Stress Test; HPA: hypothalamic-pituitary-adrenal; WISC: Wechsler Intelligence Scale for Children; SES: socio-economic status; ROI: region of interest; ADHD: attention deficit hyperactivity disorder; RSA: respiratory sinus arrhythmia; PTSD: post-traumatic stress disorder; dACC: dorsal anterior cingulate cortex; PFC: prefrontal cortex; vlPFC: ventrolateral prefrontal cortex; mPFC: medial prefrontal cortex; vmPFC: ventromedial prefrontal cortex

## References

- Busso, D. S., McLaughlin, K. A., & Sheridan, M. A. (2017). Dimensions of adversity, physiological reactivity, and externalizing psychopathology in adolescence: Deprivation and threat. *Psychosomatic Medicine*, 79(2), 162–171.  
<https://doi.org/10.1097/PSY.0000000000000369>
- Colich, N. L., Platt, J. M., Keyes, K. M., Sumner, J. A., Allen, N. B., & McLaughlin, K. A. (2019). Earlier age at menarche as a transdiagnostic mechanism linking childhood trauma with multiple forms of psychopathology in adolescent girls. *Psychological Medicine*, 1–9.  
<https://doi.org/10.1017/S0033291719000953>
- Dennison, M. J., Rosen, M. L., Sambrook, K. A., Jenness, J. L., Sheridan, M. A., & McLaughlin, K. A. (2017). Differential associations of distinct forms of childhood adversity with neurobehavioral measures of reward processing: A developmental pathway to depression. *Child Development*, 90(1), 96–113. <https://doi.org/10.1111/cdev.13011>
- Gooding, H. C., Milliren, C. E., Austin, S. B., Sheridan, M. A., & McLaughlin, K. A. (2016). Child Abuse, Resting Blood Pressure, and Blood Pressure Reactivity to Psychosocial Stress. *Journal of Pediatric Psychology*, 41(1), 5–14. <https://doi.org/10.1093/jpepsy/jsv040>
- Heleniak, C., & McLaughlin, K. A. (2019). Social-cognitive mechanisms in the cycle of violence: Cognitive and affective theory of mind, and externalizing psychopathology in children and adolescents. *Development and Psychopathology*, 1–16.  
<https://doi.org/10.1017/S0954579419000725>
- Heleniak, C., McLaughlin, K. A., Ormel, J., & Riese, H. (2016). Cardiovascular reactivity as a mechanism linking child trauma to adolescent psychopathology. *Biological Psychology*, 120, 108–119. <https://doi.org/10.1016/j.biopsycho.2016.08.007>



Jenness, J. L., Miller, A. B., Rosen, M. L., & McLaughlin, K. A. (2019). Extinction Learning as a Potential Mechanism Linking High Vagal Tone with Lower PTSD Symptoms among Abused Youth. *Journal of Abnormal Child Psychology*, *47*(4), 659–670.

<https://doi.org/10.1007/s10802-018-0464-0>

Jenness, J. L., Rosen, M. L., Sambrook, K. A., Dennison, M. J., Lambert, H. K., Sheridan, M. A., & McLaughlin, K. A. (2018). Violence exposure and neural systems underlying working memory for emotional stimuli in youth. *Development and Psychopathology*, *30*(4), 1517–

1528. <https://doi.org/10.1017/S0954579417001638>

Lambert, H. K., King, K. M., Monahan, K. C., & McLaughlin, K. A. (2017). Differential associations of threat and deprivation with emotion regulation and cognitive control in adolescence. *Development and Psychopathology*, *29*(3), 929–940.

<https://doi.org/10.1017/S0954579416000584>

Lambert, H. K., Peverill, M., Sambrook, K. A., Rosen, M. L., Sheridan, M. A., & McLaughlin, K. A. (2019). Altered development of hippocampus-dependent associative learning following early-life adversity. *Developmental Cognitive Neuroscience*, *38*.

<https://doi.org/10.1016/j.dcn.2019.100666>

Lambert, H. K., Sheridan, M. A., Sambrook, K. A., Rosen, M. L., Askren, M. K., & McLaughlin, K. A. (2017). Hippocampal Contribution to Context Encoding across Development Is Disrupted following Early-Life Adversity. *The Journal of Neuroscience*,

*37*(7), 1925–1934. <https://doi.org/10.1523/JNEUROSCI.2618-16.2017>

Lawson, G. M., Camins, J. S., Wisse, L., Wu, J., Duda, J. T., Cook, P. A., ... Farah, M. J. (2017). Childhood socioeconomic status and childhood maltreatment: Distinct associations with brain structure. *PLoS ONE*, *12*(4), 1–16. <https://doi.org/10.1371/journal.pone.0175690>

LoPilato, A. M., Addington, J., Bearden, C. E., Cadenhead, K. S., Cannon, T. D., Cornblatt, B.

A., ... Walker, E. F. (2019). Stress perception following childhood adversity: Unique associations with adversity type and sex. *Development and Psychopathology*, 1–14.

<https://doi.org/10.1017/S0954579419000130>

LoPilato, A. M., Goines, K., Addington, J., Bearden, C. E., Cadenhead, K. S., Cannon, T. D., ...

Walker, E. F. (2019). Impact of childhood adversity on corticolimbic volumes in youth at clinical high-risk for psychosis. *Schizophrenia Research*, 213, 48–55.

<https://doi.org/10.1016/j.schres.2019.01.048>

Machlin, L., McLaughlin, K. A., & Sheridan, M. A. (2019). Brain structure mediates the association between socioeconomic status and attention-deficit/hyperactivity disorder.

*Developmental Science*, e12844. <https://doi.org/10.1111/desc.12844>

Machlin, L., Miller, A. B., Snyder, J., McLaughlin, K. A., & Sheridan, M. A. (2019). Differential

Associations of Deprivation and Threat With Cognitive Control and Fear Conditioning in Early Childhood. *Frontiers in Behavioral Neuroscience*, 13, 80.

<https://doi.org/10.3389/fnbeh.2019.00080>

Marusak, H. A., Hatfield, J. R., Thomason, M. E., & Rabinak, C. A. (2017). Reduced ventral

tegmental area–hippocampal connectivity in children and adolescents exposed to early threat. *Biological Psychiatry: Cognitive Neuroscience and Neuroimaging*, 2, 130–137.

<https://doi.org/10.1016/j.bpsc.2016.11.002>

McLaughlin, K. A., Sheridan, M. A., Alves, S., & Mendes, W. B. (2014). Child maltreatment

and autonomic nervous system reactivity: Identifying dysregulated stress reactivity patterns using the biopsychosocial model of challenge and threat. *Psychosomatic Medicine*, 76(7),

538–546. <https://doi.org/10.1097/PSY.000000000000098>.Child

- McLaughlin, K. A., Sheridan, M. A., Gold, A. L., Duys, A., Lambert, H. K., Peverill, M., ... Pine, D. S. (2016). Maltreatment exposure, brain structure, and fear conditioning in children and adolescents. *Neuropsychopharmacology*, *41*(8), 1956–1964.  
<https://doi.org/10.1038/npp.2015.365>
- Miller, A. B., Sheridan, M. A., Hanson, J. L., McLaughlin, K. A., Bates, J. E., Lansford, J. E., ... Dodge, K. A. (2018). Dimensions of deprivation and threat, Psychopathology, and potential mediators: A multi-year longitudinal analysis. *Journal of Abnormal Psychology*, *127*(2), 160–170.
- Mitchell, A. M., Kowalsky, J. M., Epel, E. S., Lin, J., & Christian, L. M. (2018). Childhood adversity, social support, and telomere length among perinatal women. *Psychoneuroendocrinology*, *87*, 43–52. <https://doi.org/10.1016/j.psyneuen.2017.10.003>
- Nicol, K., Pope, M., Romaniuk, L., & Hall, J. (2015). Childhood trauma, midbrain activation and psychotic symptoms in borderline personality disorder. *Translational Psychiatry*, *5*, e559-6.  
<https://doi.org/10.1038/tp.2015.53>
- Peverill, M., Sheridan, M. A., Busso, D. S., & McLaughlin, K. A. (2019). Atypical Prefrontal–Amygdala Circuitry Following Childhood Exposure to Abuse: Links With Adolescent Psychopathology. *Child Maltreatment*, 107755951985267.  
<https://doi.org/10.1177/1077559519852676>
- Platt, J. M., McLaughlin, K. A., Luedtke, A. R., Ahern, J., Kaufman, A. S., & Keyes, K. M. (2018). Targeted estimation of the relationship between childhood adversity and fluid intelligence in a US population sample of adolescents. *American Journal of Epidemiology*, *187*(7), 1456–1466. <https://doi.org/10.1093/aje/kwy006>
- Rodman, A. M., Jenness, J. L., Weissman, D. G., Pine, D. S., & McLaughlin, K. A. (2019).

Neurobiological markers of resilience to depression and anxiety following childhood maltreatment: The role of neural circuits supporting the cognitive control of emotion.

*Biological Psychiatry*. <https://doi.org/10.1016/J.BIOPSYCH.2019.04.033>

Rosen, M. L., Hagen, M. P., Lurie, L. A., Miles, Z. E., Sheridan, M. A., Meltzoff, A. N., & McLaughlin, K. A. (2019). Cognitive Stimulation as a Mechanism Linking Socioeconomic Status With Executive Function: A Longitudinal Investigation. *Child Development*, *cdev.13315*. <https://doi.org/10.1111/cdev.13315>

Sheridan, M. A., Peverill, M., Finn, A. S., & McLaughlin, K. A. (2017). Dimensions of childhood adversity have distinct associations with neural systems underlying executive functioning. *Development and Psychopathology*, *29(5)*, 1777–1794. <https://doi.org/10.1017/S0954579417001390>

Slopen, N., Tang, A., Nelson, C. A., Zeanah, C. H., McDade, T. W., McLaughlin, K. A., & Fox, N. (2019). The consequences of foster care versus institutional care in early childhood on adolescent cardiometabolic and immune markers. *Psychosomatic Medicine*, *1*. <https://doi.org/10.1097/PSY.0000000000000696>

Sumner, J. A., Colich, N. L., Uddin, M., Armstrong, D., & McLaughlin, K. A. (2019). Early Experiences of Threat, but Not Deprivation, Are Associated With Accelerated Biological Aging in Children and Adolescents. *Biological Psychiatry*, *85(3)*, 268–278. <https://doi.org/10.1016/j.biopsych.2018.09.008>

Teicher, M. H., Anderson, C. M., Ohashi, K., Khan, A., McGreenery, C. E., Bolger, E. A., ... Vitaliano, G. D. (2018). Differential effects of childhood neglect and abuse during sensitive exposure periods on male and female hippocampus. *NeuroImage*, *169*(December 2017), 443–452. <https://doi.org/10.1016/j.neuroimage.2017.12.055>

- Vaughn-Coaxum, R. A., Dhawan, N., Sheridan, M. A., Hart, M. J., & Weisz, J. R. (2019). Dimensions of adversity in association with adolescents' depression symptoms: Distinct moderating roles of cognitive and autonomic function. *Development and Psychopathology*, 1–14. <https://doi.org/10.1017/S0954579419001172>
- Whalen, D. J., Belden, A. C., Tillman, R., Barch, D. M., & Luby, J. L. (2016). Early adversity, psychopathology, and latent class profiles of global physical health from preschool through early adolescence. *Psychosomatic Medicine*, 78(9), 1008–1018. <https://doi.org/10.1097/PSY.0000000000000398>.Early
- Zhang, Y., Cecil, C. C., Barker, E. D., Mori, S., & Lau, J. Y. (2019). Dimensionality of early adversity and associated behavioral and emotional symptoms: Data from a sample of Japanese institutionalized children and adolescents. *Child Psychiatry and Human Development*, 50(3), 425–438. <https://doi.org/10.1007/s10578-018-0850-4>
